# Supplementary material for: The relationship between plant-eating and hair evacuation in snow leopards (Panthera uncia)
Source: PLoS One. 2020 Jul 31;15(7):e0236635. doi: 10.1371/journal.pone.0236635 (PMC7394552; doi:10.1371/journal.pone.0236635)
Supplement: S2 File — (XLSX) [file pone.0236635.s003.xlsx]

## Sheet: f1
ShinyStan
	n_eff	Rhat	mean	mcse	sd	0.025	0.25	0.5	0.75	0.975
(Intercept)	3323	1	5	0.1	5.2	0.1	0.9	3.3	7.4	18.9
s_plant	3802	1	2.3	0.2	9.9	-18.7	-3.9	3	8.6	21
shape	1851	1	0.7	0	0.7	0.1	0.3	0.5	0.9	2.7
mean_PPD	8195	1	5.2	0.1	11.3	0	0.6	1.8	5.1	32.6
log-posterior	3522	1	-7.9	0	1.2	-10.9	-8.4	-7.6	-7	-6.5
ShinyStan
	n_eff	Rhat	mean	mcse	sd	0.025	0.25	0.5	0.75	0.975
(Intercept)	4112	1	5.5	0.1	4.8	0.6	2	3.9	7.5	18.4
b_plant	3556	1	-11.6	0.8	49.2	-106.9	-43.3	-15	19	92.6
shape	1738	1	0.8	0	0.7	0.1	0.3	0.5	0.9	2.9
mean_PPD	7805	1	5.1	0.1	11.1	0	0.6	1.8	5.1	32.3
log-posterior	3240	1	-7.9	0	1.2	-11	-8.4	-7.6	-7	-6.5
ShinyStan
	n_eff	Rhat	mean	mcse	sd	0.025	0.25	0.5	0.75	0.975
(Intercept)	5748	1	6.4	0.1	6.4	-3.6	2	5.2	9.7	22
a_plant	3701	1	-5.2	0.4	25.5	-54	-21.5	-6.8	11.1	48.1
shape	2157	1	0.7	0	0.6	0.1	0.3	0.5	0.9	2.5
mean_PPD	8750	1	5.4	0.1	12.3	0	0.6	1.8	5.5	32.1
log-posterior	3312	1	-7.9	0	1.2	-11	-8.3	-7.5	-7	-6.5

## Sheet: f2
ShinyStan
	n_eff	Rhat	mean	mcse	sd	0.025	0.25	0.5	0.75	0.975
(Intercept)	3536	1	5.9	0.1	5.7	0.1	1.4	4.1	8.8	20.3
s_plant	4134	1	3.3	0.8	49.6	-100.7	-24.7	2.4	32.1	104.3
shape	2714	1	0.2	0	0.1	0.1	0.1	0.2	0.3	0.6
mean_PPD	7602	1	6.1	0.1	12.5	0	0.5	2.1	6.6	36.6
log-posterior	3395	1	-2.7	0	1.2	-5.8	-3.2	-2.4	-1.8	-1.3
ShinyStan
	n_eff	Rhat	mean	mcse	sd	0.025	0.25	0.5	0.75	0.975
(Intercept)	3887	1	4.4	0.1	5	0.1	0.6	2.6	6.4	17.9
b_plant	4460	1	1.1	0.1	5.4	-10.2	-2	1.2	4.4	11.5
shape	2968	1	0.3	0	0.2	0.1	0.2	0.2	0.3	0.7
mean_PPD	8033	1	4.4	0.1	9.8	0	0.3	1.2	4.3	28.8
log-posterior	3898	1	-2.5	0	1.2	-5.5	-3	-2.2	-1.7	-1.2
ShinyStan
	n_eff	Rhat	mean	mcse	sd	0.025	0.25	0.5	0.75	0.975
(Intercept)	3006	1	5.5	0.1	5.7	0.1	1.1	3.7	8.2	20.5
a_plant	4067	1	8	1.2	78.3	-153.5	-35.4	5.5	54.6	167.9
shape	715	1	0.3	0	0.2	0.1	0.2	0.2	0.3	0.7
mean_PPD	7512	1	5.8	0.1	12.6	0	0.5	1.8	5.9	35.4
log-posterior	1550	1	-2.7	0	1.3	-5.9	-3.3	-2.3	-1.8	-1.2

## Sheet: f4_1
ShinyStan
	n_eff	Rhat	mean	mcse	sd	0.025	0.25	0.5	0.75	0.975
(Intercept)	3855	1	3.6	0	2.2	1.1	2.1	3	4.4	9.3
s_plant	3590	1	1.2	0.1	3.5	-5.2	-1.1	0.9	3.2	8.8
shape	4067	1	1	0	0.4	0.4	0.7	1	1.3	2
mean_PPD	4758	1	4	0	2.5	1.3	2.5	3.4	4.9	10.2
log-posterior	2698	1	-25.8	0	1.4	-29.4	-26.5	-25.5	-24.7	-24
ShinyStan
	n_eff	Rhat	mean	mcse	sd	0.025	0.25	0.5	0.75	0.975
(Intercept)	3217	1	2.7	0	1.8	0.8	1.5	2.2	3.2	7.8
b_plant	3819	1	2.7	0	3	-2.8	0.9	2.5	4.3	9.3
shape	3916	1	1.1	0	0.5	0.4	0.8	1.1	1.4	2.2
mean_PPD	4672	1	3.7	0	2.2	1.2	2.3	3.2	4.4	9.4
log-posterior	2628	1	-25.2	0	1.5	-29	-25.9	-24.9	-24.1	-23.5
ShinyStan
	n_eff	Rhat	mean	mcse	sd	0.025	0.25	0.5	0.75	0.975
(Intercept)	3256	1	3.9	0	2.3	1.3	2.4	3.3	4.6	10.1
a_plant	3291	1	0.7	0.1	3.4	-5.4	-1.3	0.4	2.4	8.7
shape	3781	1	1	0	0.4	0.4	0.7	0.9	1.2	2
mean_PPD	4472	1	4.1	0	2.6	1.3	2.5	3.5	5	10.9
log-posterior	2294	1	-25.9	0	1.6	-30	-26.6	-25.5	-24.7	-24

## Sheet: f4_2
ShinyStan
	n_eff	Rhat	mean	mcse	sd	0.025	0.25	0.5	0.75	0.975
(Intercept)	5197	1	2.5	0	0.8	1.5	2	2.4	2.9	4.4
s_plant	1664	1	7	0.2	9.7	-4.4	0.1	4.4	11.1	31.8
shape	3364	1	1	0	0.3	0.5	0.8	1	1.2	1.7
mean_PPD	5773	1	2.8	0	1.1	1.3	2	2.6	3.3	5.6
log-posterior	2264	1	-36.5	0	1.4	-40.2	-37.2	-36.2	-35.5	-34.8
ShinyStan
	n_eff	Rhat	mean	mcse	sd	0.025	0.25	0.5	0.75	0.975
(Intercept)	4487	1	2.5	0	0.8	1.4	2	2.3	2.8	4.4
b_plant	1913	1	8.6	0.2	10.5	-4.1	0.7	5.9	13.9	35.5
shape	3685	1	1	0	0.3	0.5	0.8	1	1.2	1.7
mean_PPD	5300	1	2.8	0	1.2	1.2	2	2.6	3.3	5.7
log-posterior	2675	1	-36.4	0	1.4	-39.9	-37.1	-36.1	-35.4	-34.8
ShinyStan
	n_eff	Rhat	mean	mcse	sd	0.025	0.25	0.5	0.75	0.975
(Intercept)	4892	1	2.4	0	0.8	1.3	1.9	2.3	2.8	4.4
a_plant	1665	1	7.4	0.2	9.6	-4.7	0.4	5.1	12.2	31.7
shape	2750	1	1.1	0	0.3	0.5	0.8	1	1.2	1.8
mean_PPD	5590	1	2.8	0	1.1	1.3	2	2.6	3.3	5.6
log-posterior	2405	1	-36.4	0	1.4	-39.9	-37.1	-36.1	-35.4	-34.7

## Sheet: f4_3
ShinyStan
	n_eff	Rhat	mean	mcse	sd	0.025	0.25	0.5	0.75	0.975
(Intercept)	5003	1	6.4	0.1	5.5	0.5	2.1	4.8	9.1	20.9
s_plant	5136	1	10.4	2.1	152.4	-294	-82	6.4	104.9	320.9
shape	5196	1	0.3	0	0.1	0.1	0.2	0.3	0.4	0.6
mean_PPD	8526	1	6.5	0.1	11.1	0	1	2.9	7.5	35.3
log-posterior	3605	1	-6.9	0	1.2	-10.1	-7.5	-6.6	-6	-5.5
ShinyStan
	n_eff	Rhat	mean	mcse	sd	0.025	0.25	0.5	0.75	0.975
(Intercept)	5438	1	6.7	0.1	5.6	0.5	2.4	5.1	9.4	21
b_plant	4788	1	1.1	0.3	18.4	-35.9	-10.3	0.6	12.9	38.1
shape	5278	1	0.3	0	0.1	0.1	0.2	0.3	0.4	0.6
mean_PPD	8721	1	6.7	0.1	11.2	0	1	2.9	7.5	36.7
log-posterior	3548	1	-6.9	0	1.2	-10	-7.5	-6.6	-6	-5.5
ShinyStan
	n_eff	Rhat	mean	mcse	sd	0.025	0.25	0.5	0.75	0.975
(Intercept)	4670	1	6.3	0.1	5.6	0.4	1.9	4.6	9	21
a_plant	4964	1	13.1	1	67.3	-129	-25.8	13.2	55.6	145.5
shape	5445	1	0.3	0	0.2	0.1	0.2	0.3	0.4	0.7
mean_PPD	9155	1	6.4	0.1	11.2	0	0.9	2.7	7.3	35.3
log-posterior	3689	1	-6.8	0	1.2	-9.9	-7.4	-6.5	-6	-5.5

## Sheet: f5
ShinyStan
	n_eff	Rhat	mean	mcse	sd	0.025	0.25	0.5	0.75	0.975
(Intercept)	4547	1	1.2	0	0.3	0.7	1	1.2	1.3	1.8
s_plant	1701	1	0.1	0	2	-2.7	-1.2	-0.3	0.9	4.8
shape	3415	1	3.5	0	1.4	1.4	2.5	3.3	4.3	6.6
mean_PPD	4697	1	1.2	0	0.3	0.7	1	1.2	1.4	2
log-posterior	1987	1	-14.8	0	1.5	-18.6	-15.5	-14.4	-13.7	-13.1
ShinyStan
	n_eff	Rhat	mean	mcse	sd	0.025	0.25	0.5	0.75	0.975
(Intercept)	3650	1	1.1	0	0.3	0.7	0.9	1	1.2	1.7
b_plant	2323	1	1.4	0	2	-1.6	0.1	1.2	2.3	6
shape	3988	1	3.5	0	1.4	1.4	2.5	3.3	4.3	6.7
mean_PPD	5174	1	1.2	0	0.3	0.7	1	1.2	1.4	2.1
log-posterior	2472	1	-14.6	0	1.5	-18.7	-15.3	-14.2	-13.5	-12.9
ShinyStan
	n_eff	Rhat	mean	mcse	sd	0.025	0.25	0.5	0.75	0.975
(Intercept)	3687	1	1.2	0	0.3	0.7	1	1.1	1.3	1.8
a_plant	1565	1	0.3	0.1	2	-2.4	-1	0	1.2	5.4
shape	3564	1	3.5	0	1.4	1.4	2.5	3.3	4.3	6.6
mean_PPD	5112	1	1.2	0	0.3	0.7	1	1.2	1.4	2
log-posterior	2277	1	-14.8	0	1.5	-18.5	-15.5	-14.5	-13.7	-13.1

## Sheet: f6_1
ShinyStan
	n_eff	Rhat	mean	mcse	sd	0.025	0.25	0.5	0.75	0.975
(Intercept)	4627	1	4.3	0	1.3	2.6	3.5	4.1	4.8	7.1
s_plant	1772	1	-3.7	0.1	4.2	-9.8	-6.1	-4.5	-2.4	7.8
shape	3211	1	2.9	0	1.3	1	1.9	2.6	3.6	6.2
mean_PPD	4928	1	3.9	0	1.5	1.9	3	3.6	4.5	7.4
log-posterior	2199	1	-22.6	0	1.4	-26.2	-23.3	-22.3	-21.6	-21
ShinyStan
	n_eff	Rhat	mean	mcse	sd	0.025	0.25	0.5	0.75	0.975
(Intercept)	3381	1	3.1	0	1.2	1.5	2.3	2.9	3.6	6
b_plant	3315	1	7.8	0.1	6.9	-3.4	2.9	6.9	11.8	23.7
shape	4776	1	2.4	0	1	0.9	1.7	2.3	3	4.8
mean_PPD	5443	1	4	0	1.6	1.9	3	3.7	4.7	7.9
log-posterior	2728	1	-23.1	0	1.4	-26.7	-23.7	-22.8	-22.1	-21.5
ShinyStan
	n_eff	Rhat	mean	mcse	sd	0.025	0.25	0.5	0.75	0.975
(Intercept)	4198	1	3.9	0	1.6	1.9	2.9	3.5	4.4	7.8
a_plant	2718	1	3.4	0.1	6.8	-6.8	-1.2	2.1	6.8	20.3
shape	3879	1	2.1	0	0.9	0.7	1.4	1.9	2.6	4.1
mean_PPD	5118	1	4.2	0	1.9	1.9	3	3.9	4.9	9
log-posterior	2292	1	-23.9	0	1.5	-27.8	-24.6	-23.5	-22.7	-22

## Sheet: f6_2
ShinyStan
	n_eff	Rhat	mean	mcse	sd	0.025	0.25	0.5	0.75	0.975
(Intercept)	3496	1	2.1	0	1	1	1.5	1.9	2.4	4.6
s_plant	2602	1	1.4	0.1	7.4	-10	-2.8	0.2	4.2	20.5
shape	3198	1	1.6	0	0.6	0.6	1.1	1.5	1.9	3.1
mean_PPD	3617	1	2.2	0	1.2	0.9	1.5	1.9	2.6	5.3
log-posterior	1981	1	-20.3	0	1.6	-24.5	-21.1	-19.9	-19.1	-18.4
ShinyStan
	n_eff	Rhat	mean	mcse	sd	0.025	0.25	0.5	0.75	0.975
(Intercept)	3618	1	1.8	0	0.9	0.9	1.3	1.6	2.1	4
b_plant	2768	1	4.9	0.2	8	-7.2	0.3	3.6	8	24.6
shape	3601	1	1.6	0	0.7	0.6	1.1	1.5	2	3.2
mean_PPD	3904	1	2.2	0	1.2	0.9	1.5	2	2.6	5.1
log-posterior	2050	1	-20.1	0	1.6	-24.1	-20.8	-19.7	-18.9	-18.3
ShinyStan
	n_eff	Rhat	mean	mcse	sd	0.025	0.25	0.5	0.75	0.975
(Intercept)	3226	1	2.2	0	1.1	1	1.5	1.9	2.5	4.8
a_plant	2610	1	1.3	0.1	7.2	-10.8	-3	0.4	4.6	19.1
shape	3018	1	1.5	0	0.7	0.5	1.1	1.4	1.9	3.1
mean_PPD	3360	1	2.3	0	1.2	0.9	1.5	2	2.7	5.5
log-posterior	1964	1	-20.4	0	1.6	-24.5	-21.2	-20	-19.2	-18.4

## Sheet: m4_1
ShinyStan
	n_eff	Rhat	mean	mcse	sd	0.025	0.25	0.5	0.75	0.975
(Intercept)	4020	1	4	0	2.5	1.3	2.4	3.3	4.8	10.9
s_plant	4216	1	43.9	0.8	49	-47.6	11.4	41	74.1	148
shape	4834	1	0.9	0	0.4	0.4	0.7	0.9	1.1	1.8
mean_PPD	6176	1	4.9	0	3.1	1.3	2.9	4.1	6	13.3
log-posterior	3455	1	-25.6	0	1.3	-29	-26.2	-25.3	-24.6	-24.1
ShinyStan
	n_eff	Rhat	mean	mcse	sd	0.025	0.25	0.5	0.75	0.975
(Intercept)	4344	1	4.7	0	2.6	1.8	3	4	5.5	11.7
b_plant	4937	1	7.4	0.1	10	-9.9	1	6.3	13.1	30.3
shape	4676	1	0.9	0	0.3	0.3	0.6	0.8	1.1	1.7
mean_PPD	5537	1	5.2	0	3.5	1.4	3	4.3	6.3	13.8
log-posterior	3138	1	-25.8	0	1.4	-29.4	-26.4	-25.5	-24.8	-24.2
ShinyStan
	n_eff	Rhat	mean	mcse	sd	0.025	0.25	0.5	0.75	0.975
(Intercept)	3551	1	4.4	0	2.6	1.7	2.8	3.7	5.2	11.5
a_plant	5131	1	34.3	0.6	40.5	-41.6	8.4	31.3	58.6	120.5
shape	5340	1	0.9	0	0.4	0.3	0.6	0.8	1.1	1.7
mean_PPD	5544	1	5.1	0	3.3	1.4	3	4.3	6.3	13.8
log-posterior	3146	1	-25.6	0	1.3	-29	-26.3	-25.3	-24.6	-24.1

## Sheet: m4_2
ShinyStan
	n_eff	Rhat	mean	mcse	sd	0.025	0.25	0.5	0.75	0.975
(Intercept)	3168	1	3	0.1	4	0	0.4	1.5	3.9	14.6
s_plant	2437	1	4.8	0.1	7.1	-10.4	0.5	4.8	9.2	19.1
shape	1303	1	0.5	0	0.3	0.2	0.3	0.5	0.6	1.4
mean_PPD	6056	1	4	0.1	5.1	0.3	1.4	2.5	4.6	17.2
log-posterior	1916	1	-14.3	0	1.4	-17.8	-15.2	-14.1	-13.2	-12.4
ShinyStan
	n_eff	Rhat	mean	mcse	sd	0.025	0.25	0.5	0.75	0.975
(Intercept)	4314	1	4.6	0.1	4	0.6	1.8	3.4	6.1	15.7
b_plant	4015	1	0.2	0.1	5.6	-10.9	-3.1	0	3.3	12
shape	3679	1	0.4	0	0.2	0.2	0.3	0.4	0.5	0.9
mean_PPD	6627	1	4.7	0.1	5.6	0.4	1.5	2.9	5.6	19.1
log-posterior	2437	1	-14.3	0	1.4	-17.7	-15	-14	-13.2	-12.5
ShinyStan
	n_eff	Rhat	mean	mcse	sd	0.025	0.25	0.5	0.75	0.975
(Intercept)	3864	1	4.6	0.1	4.9	-0.3	1.4	3	6.3	18.1
a_plant	4717	1	1.5	0.1	8.2	-14.8	-2.9	0.9	5.9	19
shape	4198	1	0.4	0	0.2	0.2	0.3	0.4	0.5	0.9
mean_PPD	5888	1	5	0.1	6	0.4	1.6	3.1	6.1	21.4
log-posterior	3013	1	-14.2	0	1.4	-17.6	-14.9	-14	-13.2	-12.5

[truncated: 2 more sheets: m5, m6]
